# Supplementary material for: Epstein-Barr virus subverts mevalonate and fatty acid pathways to promote infected B-cell proliferation and survival
Source: PLoS Pathog. 2019 Sep 13;15(9):e1008030. doi: 10.1371/journal.ppat.1008030 (PMC6760809; doi:10.1371/journal.ppat.1008030)
Supplement: S3 Table — (XLSX) [file ppat.1008030.s013.xlsx]

## Sheet: Table S3
Table S3. CRISPR sgRNA sequences.
SCAP #1	GGGCGAGTAATCCTTCACAG
SCAP #2	CTGCTGGACATAAGCCACCG
MYC #1	GGTAGGGGAAGACCACCGAG
MYC #2	GTATTTCTACTGCGACGAGG
PGGT1B #1	CCTCCCATCTTCCAGCTGAA
PGGT1B #2	CTAAATCGCTGTGGTTTCCG
RABGGTA #1	GCTGCAGGACTCACTAAGAG
RABGGTA #2	GCTGCTGGAGCACCTCTCGT
RABGGTB #1	CTAAGAGTGTATAAAAGATG
RABGGTB #2	CTGACAGTAATGGATCTCAT
RAB13 #1	TCCGCACTGTGGATATAGAG
RAB13 #2	CTGGATGAAAAGCATCAAGG
